# Supplementary material for: Direct Cell-Cell Contact between Mesenchymal Stem Cells and Endothelial Progenitor Cells Induces a Pericyte-Like Phenotype In Vitro
Source: Hindawi journal article supplement (doi:10.1155/2014/395781), 2014-01-01
Supplement: f1 [file 395781.f1.pdf]

# depleted-MSC in IMDM-FCS

# EPC in IMDM-FCS

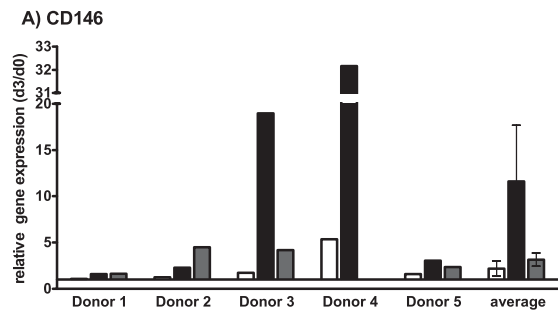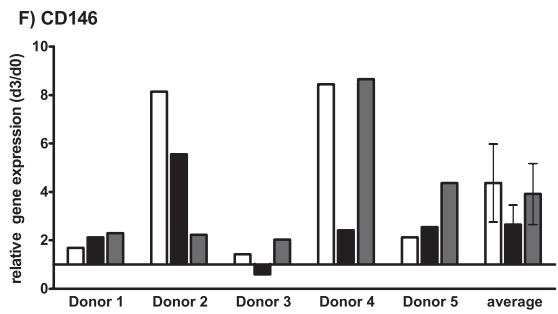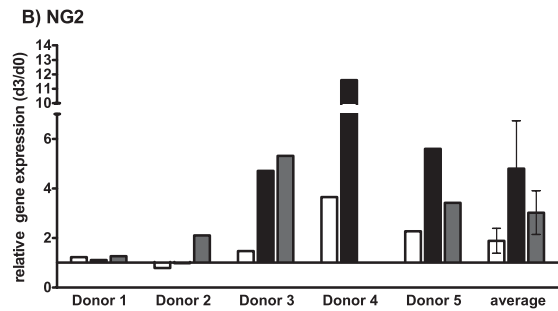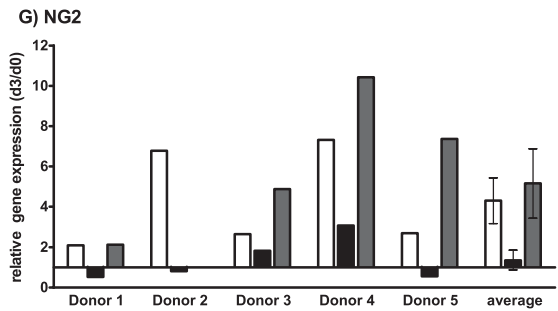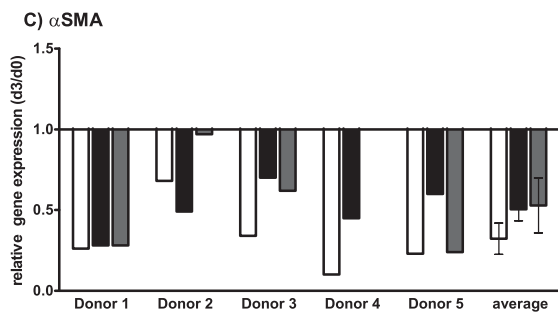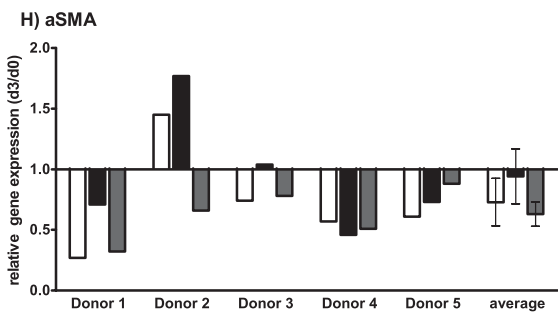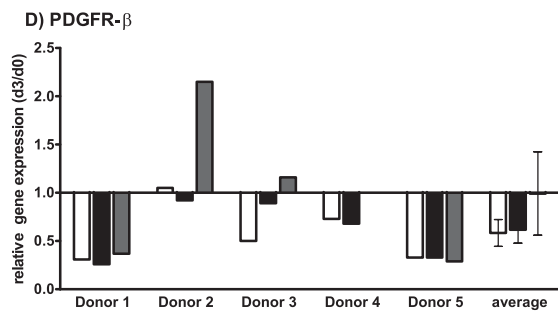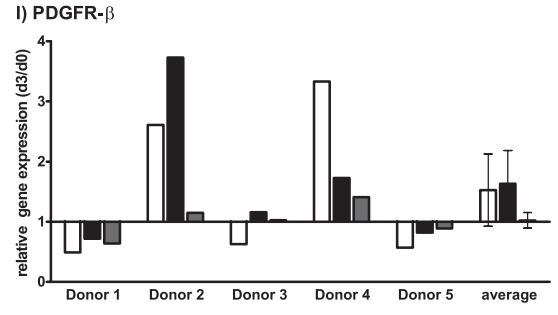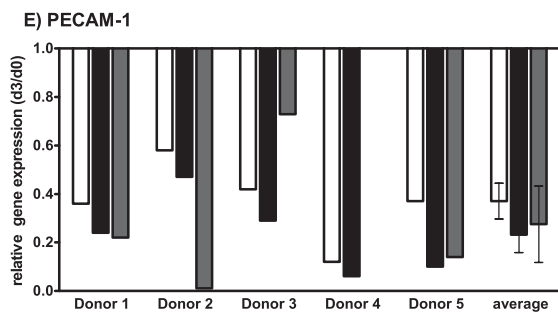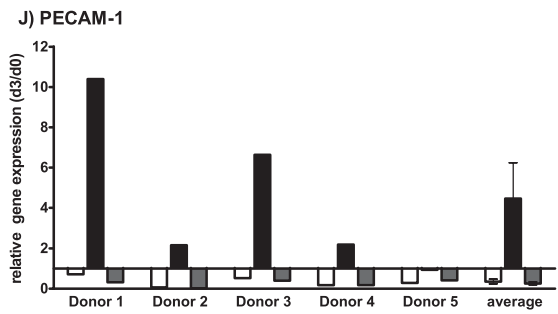

□ transwell    ■ direct co-culture    ▒ single
