# Supplementary material for: Direct Cell-Cell Contact between Mesenchymal Stem Cells and Endothelial Progenitor Cells Induces a Pericyte-Like Phenotype In Vitro
Source: Hindawi journal article supplement (doi:10.1155/2014/395781), 2014-01-01
Supplement: f2 [file 395781.f2.pdf]

# depleted-MSC in IMDM-PL

# EPC in IMDM-PL

A) CD146

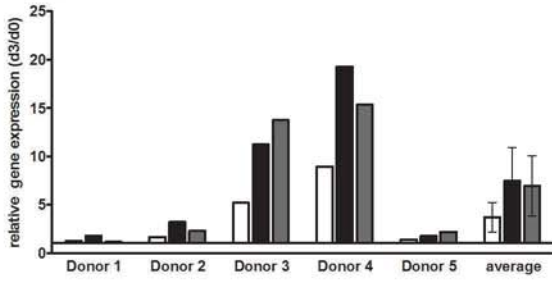

F) CD146

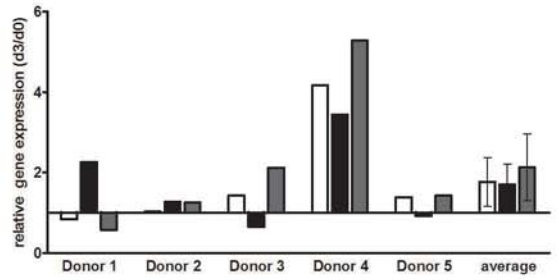

B) NG2

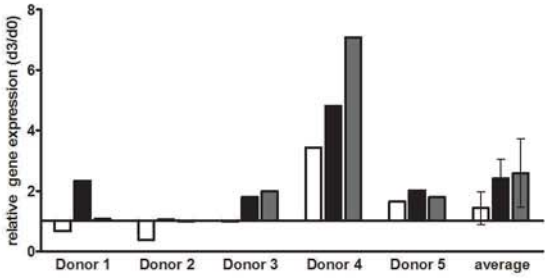

G) NG2

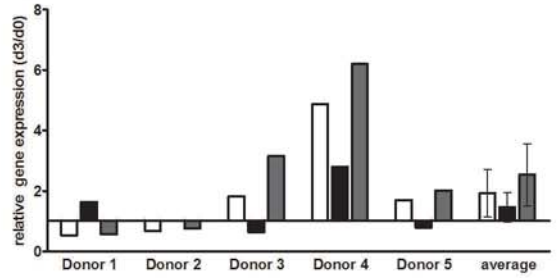

C)  $\alpha$ SMA

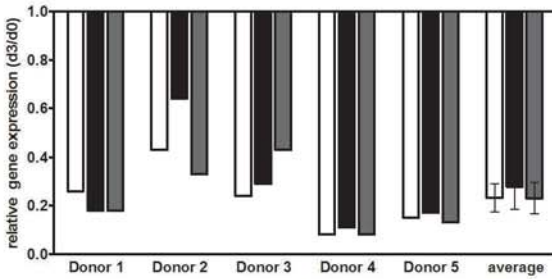

H)  $\alpha$ SMA

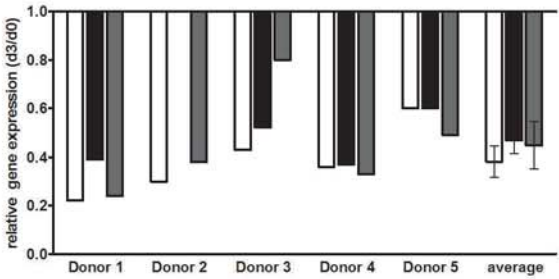

D) PDGFR- $\beta$

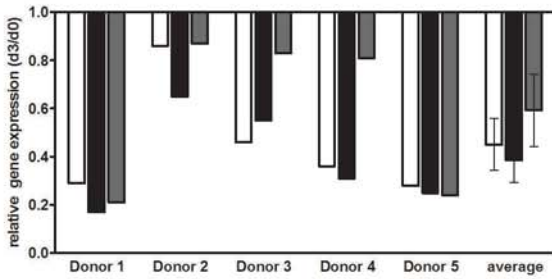

I) PDGFR- $\beta$

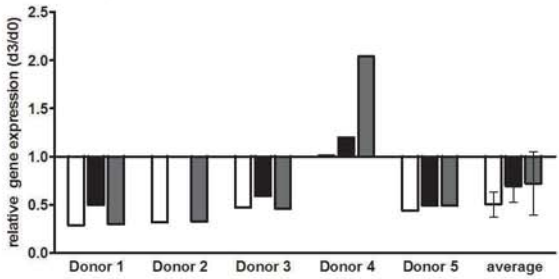

E) PECAM-1

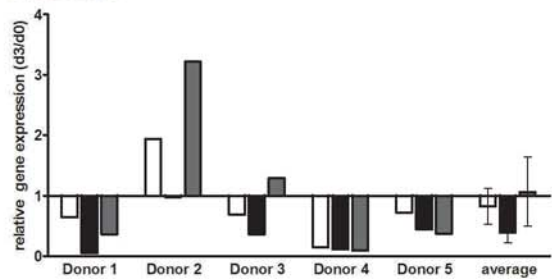

J) PECAM-1

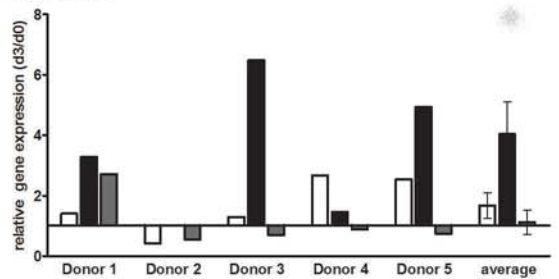

□ transwell    ■ direct co-culture    ▒ single
