# Supplementary material for: Direct Cell-Cell Contact between Mesenchymal Stem Cells and Endothelial Progenitor Cells Induces a Pericyte-Like Phenotype In Vitro
Source: Hindawi journal article supplement (doi:10.1155/2014/395781), 2014-01-01
Supplement: f3 [file 395781.f3.pdf]

| Gene           | Cell type          | Condition | IMDM-FCS        | IMDM-PL         |
|----------------|--------------------|-----------|-----------------|-----------------|
| CD146          | MSC                | transwell | 1.97 (± 0.58 )  | 3.47 (± 0.98 )  |
|                |                    | direct    | 15.15 (± 6.99 ) | 8.44 (± 3.50 )  |
|                |                    | single    | 3.25 (± 0.89 )  | 4.30 (± 1.62 )  |
|                | EPC (MSC)          | transwell | 3.37 (± 1.27 )  | 3.00 (± 0.94 )  |
|                |                    | direct    | 2.42 (± 0.78 )  | 1.70 (± 0.51 )  |
|                |                    | single    | 3.92 (± 1.26 )  | 2.13 (± 0.82 )  |
|                | depleted-MSC       | transwell | 2.19 (± 0.80 )  | 3.69 (± 1.51 )  |
|                |                    | direct    | 11.62 (± 6.07 ) | 7.44 (± 3.44 )  |
|                |                    | single    | 3.16 (± 0.70 )  | 6.93 (± 3.11 )  |
|                | EPC (depleted-MSC) | transwell | 4.37 (± 1.61 )  | 1.77 (± 0.61 )  |
|                |                    | direct    | 2.65 (± 0.81 )  | 1.70 (± 0.51 )  |
|                |                    | single    | 3.92 (± 1.26 )  | 2.13 (± 0.82 )  |
| NG2            | MSC                | transwell | 2.06 (± 0.21 )  | 1.51 (± 0.34 )  |
|                |                    | direct    | 6.40 (± 2.60 )  | 3.11 (± 0.64 )  |
|                |                    | single    | 3.21 (± 0.36 )  | 2.32 (± 0.55 )  |
|                | EPC (MSC)          | transwell | 3.73 (± 1.32 )  | 3.22 (± 1.48 )  |
|                |                    | direct    | 1.86 (± 0.73 )  | 1.36 (± 0.48 )  |
|                |                    | single    | 5.16 (± 1.72 )  | 2.54 (± 1.03 )  |
|                | depleted-MSC       | transwell | 1.88 (± 0.50 )  | 1.42 (± 0.55 )  |
|                |                    | direct    | 4.80 (± 1.94 )  | 2.41 (± 0.64 )  |
|                |                    | single    | 3.02 (± 0.88 )  | 2.59 (± 1.14 )  |
|                | EPC (depleted-MSC) | transwell | 4.30 (± 1.13 )  | 1.92 (± 0.78 )  |
|                |                    | direct    | 1.36 (± 0.49 )  | 1.46 (± 0.50 )  |
|                |                    | single    | 5.16 (± 1.72 )  | 2.54 (± 1.03 )  |
| $\alpha$ SMA   | MSC                | transwell | 0.28 (± 0.07 )  | 0.22 (± 0.05 )  |
|                |                    | direct    | 0.34 (± 0.09 )  | 0.24 (± 0.05 )  |
|                |                    | single    | 0.30 (± 0.06 )  | 0.19 (± 0.04 )  |
|                | EPC (MSC)          | transwell | 0.58 (± 0.07 )  | 0.70 (± 0.29 )  |
|                |                    | direct    | 0.97 (± 0.20 )  | 0.60 (± 0.10 )  |
|                |                    | single    | 0.63 (± 0.10 )  | 0.45 (± 0.10 )  |
|                | depleted-MSC       | transwell | 0.32 (± 0.10 )  | 0.23 (± 0.06 )  |
|                |                    | direct    | 0.50 (± 0.07 )  | 0.28 (± 0.10 )  |
|                |                    | single    | 0.53 (± 0.17 )  | 0.23 (± 0.07 )  |
|                | EPC (depleted-MSC) | transwell | 0.73 (± 0.20 )  | 0.38 (± 0.06 )  |
|                |                    | direct    | 0.94 (± 0.23 )  | 0.47 (± 0.05 )  |
|                |                    | single    | 0.63 (± 0.10 )  | 0.45 (± 0.10 )  |
| PDGFR- $\beta$ | MSC                | transwell | 0.51 (± 0.08 )  | 0.38 (± 0.05 )  |
|                |                    | direct    | 0.60 (± 0.10 )  | 0.39 (± 0.04 )  |
|                |                    | single    | 0.44 (± 0.07 )  | 0.37 (± 0.07 )  |
|                | EPC (MSC)          | transwell | 1.35 (± 0.65 )  | 0.70 (± 0.15 )  |
|                |                    | direct    | 1.46 (± 0.27 )  | 0.96 (± 0.15 )  |
|                |                    | single    | 1.02 (± 0.13 )  | 0.72 (± 0.33 )  |
|                | depleted-MSC       | transwell | 0.58 (± 0.14 )  | 0.28 (± 0.00 )  |
|                |                    | direct    | 0.62 (± 0.14 )  | 0.39 (± 0.09 )  |
|                |                    | single    | 0.99 (± 0.43 )  | 0.59 (± 0.15 )  |
|                | EPC (depleted-MSC) | transwell | 1.53 (± 0.60 )  | 0.51 (± 0.13 )  |
|                |                    | direct    | 1.63 (± 0.55 )  | 0.70 (± 0.17 )  |
|                |                    | single    | 1.02 (± 0.13 )  | 0.72 (± 0.33 )  |
| PECAM-1        | MSC                | transwell | 0.28 (± 0.09 )  | 0.45 (± 0.11 )  |
|                |                    | direct    | 0.17 (± 0.05 )  | 0.35 (± 0.14 )  |
|                |                    | single    | 0.22 (± 0.05 )  | 0.22 (± 0.06 )  |
|                | EPC (MSC)          | transwell | 0.21 (± 0.09 )  | 2.53 (± 0.89 )  |
|                |                    | direct    | 8.16 (± 3.49 )  | 10.24 (± 5.94 ) |
|                |                    | single    | 0.26 (± 0.08 )  | 1.12 (± 0.40 )  |
|                | depleted-MSC       | transwell | 0.37 (± 0.07 )  | 0.83 (± 0.30 )  |
|                |                    | direct    | 0.23 (± 0.07 )  | 0.39 (± 0.17 )  |
|                |                    | single    | 0.28 (± 0.16 )  | 1.07 (± 0.58 )  |
|                | EPC (depleted-MSC) | transwell | 0.35 (± 0.12 )  | 1.67 (± 0.42 )  |
|                |                    | direct    | 4.46 (± 1.77 )  | 4.04 (± 1.08 )  |
|                |                    | single    | 0.26 (± 0.08 )  | 1.12 (± 0.40 )  |
